# Supplementary material
Source: PubMed Central journal article supplement (PMC8808917)
Supplement: Supplementary_Table.pdf [file Supplementary_Table.pdf]

**Supplementary Table. Subgroup analysis**

| MOCART score                     | CCP-ACI group                        |         | MFx group                            |          | <i>p</i> -value |
|----------------------------------|--------------------------------------|---------|--------------------------------------|----------|-----------------|
|                                  | Difference at week 48 from screening | n (%)   | Difference at week 48 from screening | n (%)    |                 |
| <b>Sex</b>                       |                                      |         |                                      |          |                 |
| Male                             | 44.8 ± 13.9                          | 14 (70) | 31.7 ± 32.6                          | 3 (30)   | n.s.            |
| Female                           | 38.8 ± 11.2                          | 6 (30)  | 21.8 ± 14.0                          | 7 (70)   | 0.036           |
| <b>Age</b>                       |                                      |         |                                      |          |                 |
| < 50 years                       | 47.1 ± 10.2                          | 11 (55) | 24.6 ± 24.4                          | 6 (60)   | n.s.            |
| ≥ 50 years                       | 38.1 ± 15.1                          | 9 (45)  | 15.0 ± 13.4                          | 4 (40)   | n.s.            |
| <b>BMI</b>                       |                                      |         |                                      |          |                 |
| < 25 kg/m <sup>2</sup>           | 46.3 ± 13.6                          | 12 (60) | 17.5 ± 18.9                          | 3 (30)   | 0.009           |
| ≥ 25 kg/m <sup>2</sup>           | 38.1 ± 11.4                          | 8 (40)  | 27.9 ± 20.7                          | 7 (70)   | n.s.            |
| <b>Activity level</b>            |                                      |         |                                      |          |                 |
| Non-athletes                     | 42.7 ± 14.6                          | 15 (75) | 20.6 ± 15.5                          | 9 (90)   | 0.002           |
| Athletes                         | 44.0 ± 8.6                           | 5 (25)  | 62.5 ± 0.0                           | 1 (10)   | n.s.            |
| <b>Cause</b>                     |                                      |         |                                      |          |                 |
| Traumatic                        | 44.3 ± 12.6                          | 10 (5)  | -                                    | 0 (0)    | n.a.            |
| Non-traumatic                    | 41.8 ± 14.2                          | 10 (5)  | 24.8 ± 19.7                          | 10 (10)  | 0.040           |
| <b>Lesion site</b>               |                                      |         |                                      |          |                 |
| Femoral condyle                  | 45.6 ± 11.0                          | 9 (45)  | 18.9 ± 17.1                          | 7 (70)   | 0.002           |
| Trochlear                        | 40.9 ± 14.8                          | 11 (55) | 38.3 ± 21.8                          | 3 (30)   | n.s.            |
| <b>KL grade</b>                  |                                      |         |                                      |          |                 |
| 1                                | 46.4 ± 12.8                          | 13 (65) | 29.6 ± 18.5                          | 6 (60)   | 0.034           |
| 2                                | 36.8 ± 12.2                          | 7 (35)  | 17.5 ± 21.9                          | 4 (40)   | n.s.            |
| <b>ICRS grade</b>                |                                      |         |                                      |          |                 |
| 3                                | 36.5 ± 10.4                          | 5 (25)  | 0.0 ± 0.0                            | 1 (10)   | n.a.            |
| 4                                | 45.2 ± 13.5                          | 15 (75) | 27.5 ± 18.8                          | 9 (90)   | 0.014           |
| <b>Defect area<sup>†</sup></b>   |                                      |         |                                      |          |                 |
| < 4 cm <sup>2</sup>              | 42.2 ± 13.0                          | 15 (75) | 23.9 ± 20.7                          | 9 (90)   | 0.014           |
| ≥ 4 cm <sup>2</sup>              | 45.5 ± 14.7                          | 5 (25)  | 32.5 ± 0.0                           | 1 (0)    | n.a.            |
| <b>Defect depth</b>              |                                      |         |                                      |          |                 |
| < 6 mm                           | 40.5 ± 12.5                          | 16 (80) | 24.8 ± 19.7                          | 10 (100) | 0.020           |
| ≥ 6 mm                           | 53.1 ± 12.0                          | 4 (20)  | n.a.                                 | 0 (0)    | n.a.            |
| <b>Defect volume<sup>†</sup></b> |                                      |         |                                      |          |                 |
| < 2 cm <sup>3</sup>              | 41.2 ± 13.2                          | 14 (70) | 24.8 ± 19.7                          | 10 (100) | 0.022           |
| ≥ 2 cm <sup>3</sup>              | 47.1 ± 13.3                          | 6 (30)  | n.a.                                 | 0 (0)    | n.a.            |

Values are means ± SDs.

Abbreviations: MOCART, magnetic resonance observation of cartilage repair tissue; CCP-ACI, costal chondrocyte-derived pellet-type autologous chondrocyte implantation; MFX, microfracture; BMI, body mass index; KL, Kellgren-Lawrence; ICRS, International Cartilage Repair Society; n.s., not significant; n.a., not applicable.
